# Supplementary material for: Analysis of the effect of catalyst layer thickness on the performance and durability of platinum group metal-free catalysts for polymer electrolyte membrane fuel cells
Source: Royal Society of Chemistry journal article supplement (doi:10.1039/c9se00252a), 2019-01-01
Supplement: c9se00252a1.pdf [file c9se00252a1.pdf]

## Supplementary Material S1

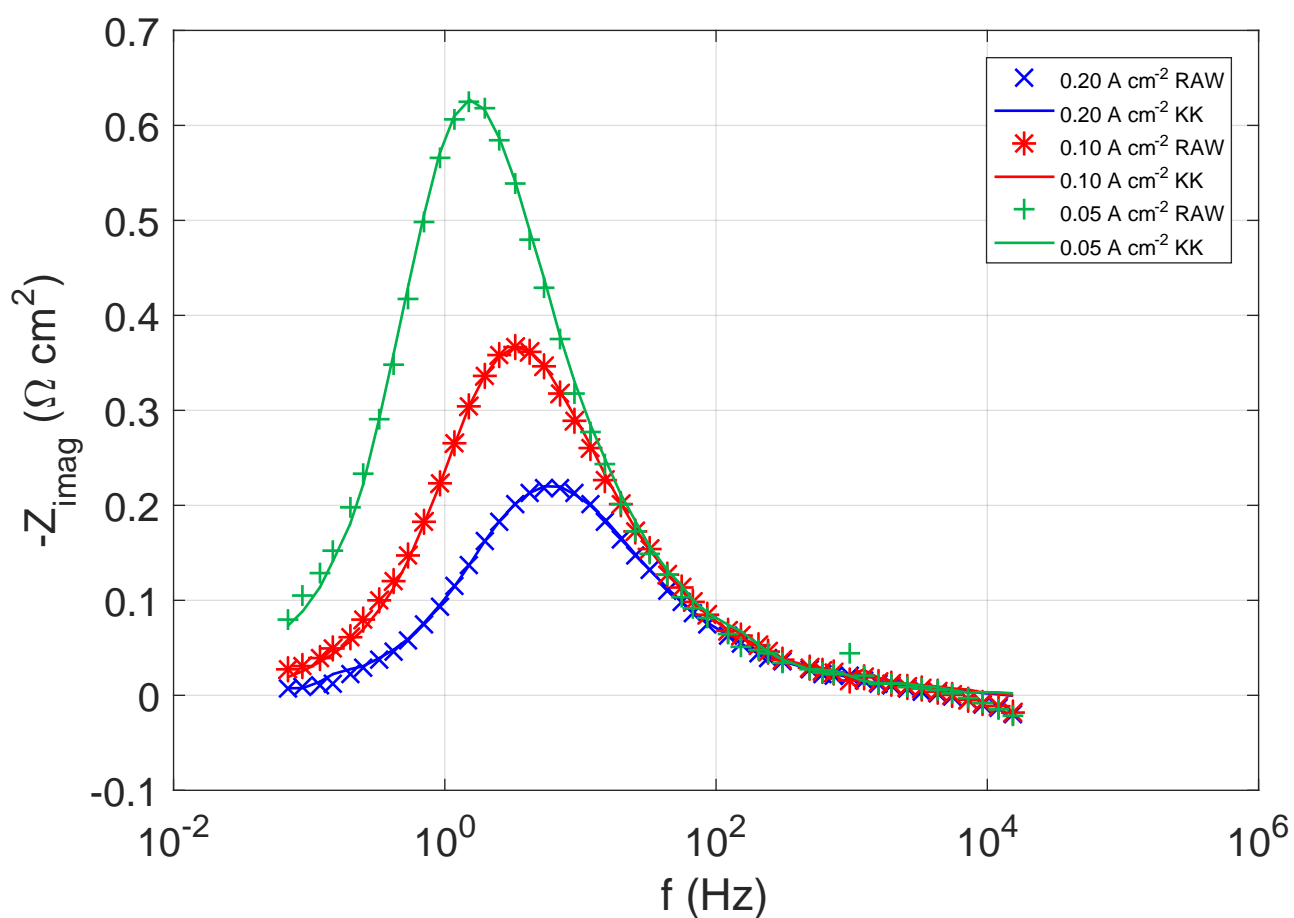

Figure S1. Example of imaginary part of spectra as measured (symbols) or simulated by Kramers-Kronig analysis. Sample with 1  $\text{mg cm}^{-2}$  catalyst loading and 45% ionomer content.
