# Supplementary material for: Analysis of the effect of catalyst layer thickness on the performance and durability of platinum group metal-free catalysts for polymer electrolyte membrane fuel cells
Source: Royal Society of Chemistry journal article supplement (doi:10.1039/c9se00252a), 2019-01-01
Supplement: c9se00252a2.pdf [file c9se00252a2.pdf]

# Supplementary material S2

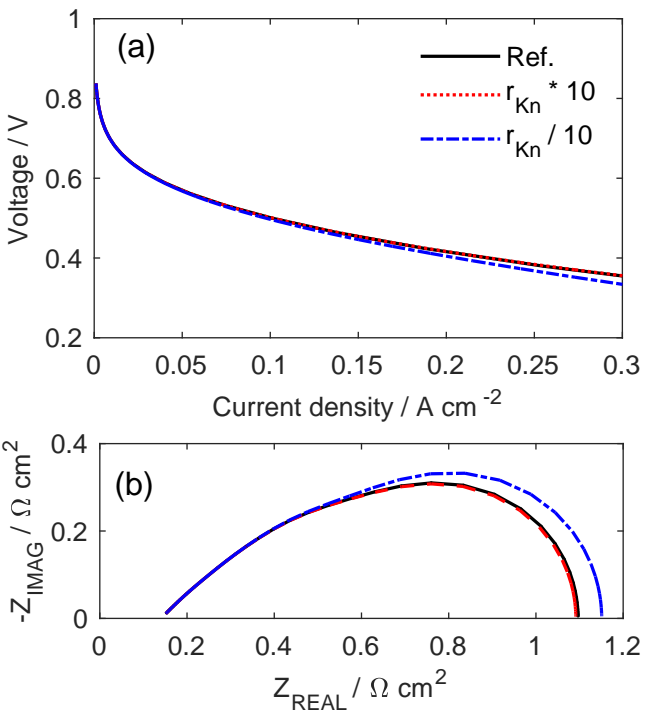

Figure S2. Sensitivity analysis on Knudsen average pore radius in the catalyst layer: (a) effect on polarization curve; (b) effect on EIS at 0.1 A cm<sup>-2</sup>. Operating condition: fully saturated H<sub>2</sub>/Air, 1 bar backpressure.
